# Supplementary material for: Drought and child vaccination coverage in 22 countries in sub-Saharan Africa: A retrospective analysis of national survey data from 2011 to 2019
Source: PLOS journal article supplement (doi:10.1371/journal.pmed.1003678), 2021-09-28

**Figure S1. Flow chart depicting how the final analytic sample was selected**

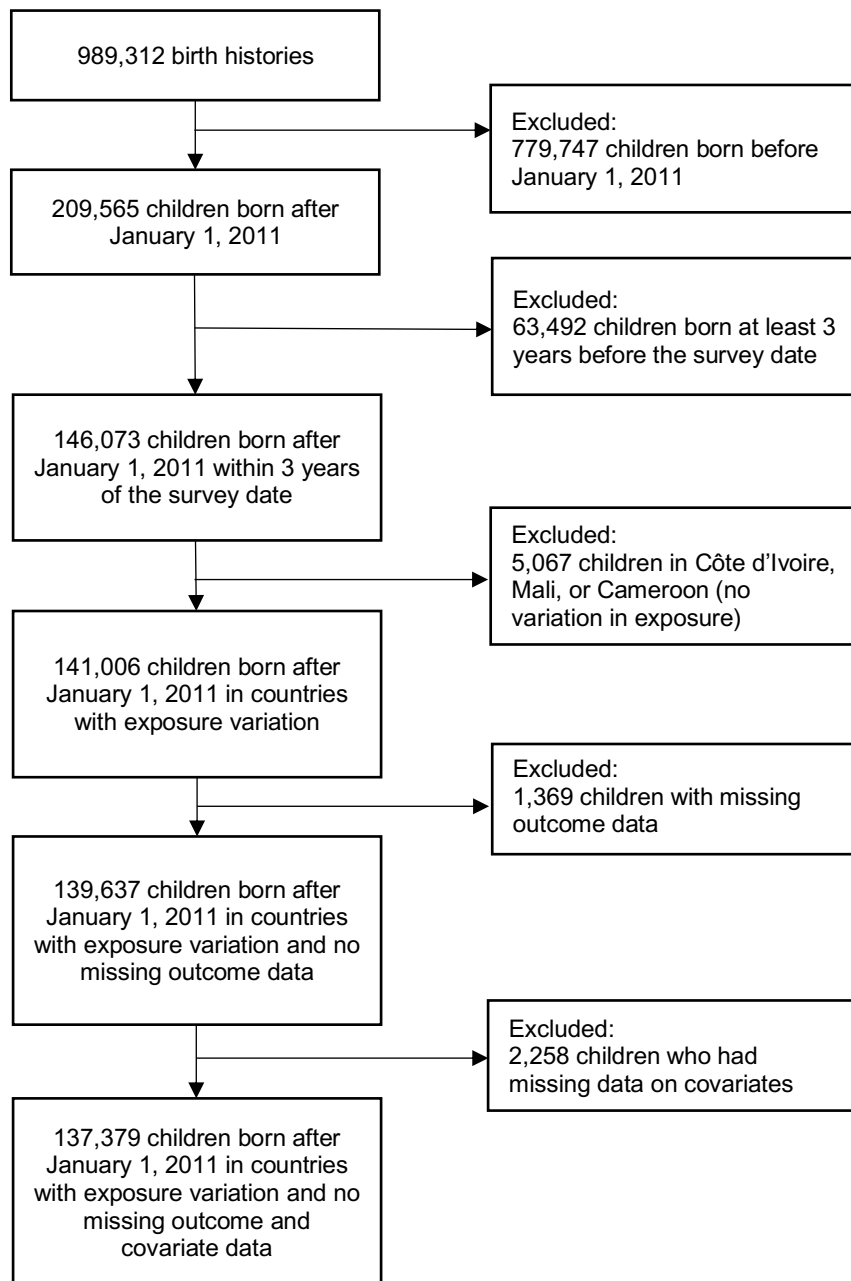

Supplement: S2 (10.1371/journal.pmed.1003678.s002) [file journal.pmed.1003678.s002]
